1                   **The role of isoforms in the evolution of cryptic coloration in *Peromyscus* mice**

2  
3 Ricardo Mallarino<sup>1\*</sup>, Tess A. Linden<sup>1\*</sup>, Catherine R. Linnen<sup>2</sup>, and Hopi E. Hoekstra<sup>1§</sup>  
4  
5

6 <sup>1</sup>Howard Hughes Medical Institute and Departments of Organismic & Evolutionary Biology and  
7       Molecular & Cellular Biology, Museum of Comparative Zoology, Harvard University, 26  
8       Oxford Street, Cambridge MA 02138 USA

9 <sup>2</sup>Department of Biology, University of Kentucky, 675 Rose Street, Lexington, KY 40506 USA

10 \* Equal contribution

11 § Author for correspondence: [hoekstra@oeb.harvard.edu](mailto:hoekstra@oeb.harvard.edu)  
12  
13  
14  
15  
16  
17  
18  
19  
20  
21  
22

## 23 Abstract

24 A central goal of evolutionary biology is to understand the molecular mechanisms  
25 underlying phenotypic adaptation. While the contribution of protein-coding and *cis*-regulatory  
26 mutations to adaptive traits have been well documented, additional sources of variation—such as  
27 the production of alternative RNA transcripts from a single gene, or isoforms—have been  
28 understudied. Here, we focus on the pigmentation gene *Agouti*, known to express multiple  
29 alternative transcripts, to investigate the role of isoform usage in the evolution of cryptic color  
30 phenotypes in deer mice (genus *Peromyscus*). We first characterize the *Agouti* isoforms  
31 expressed in the *Peromyscus* skin and find two novel isoforms not previously identified in *Mus*.  
32 Next, we show that a locally adapted light-colored population of *P. maniculatus* living on the  
33 Nebraska Sand Hills shows an up-regulation of a single *Agouti* isoform, termed 1C, compared to  
34 their ancestral dark-colored conspecifics. Using *in vitro* assays, we show that this preference for  
35 isoform 1C may be driven by isoform-specific differences in translation. In addition, using an  
36 admixed population of wild-caught mice, we find that variation in overall *Agouti* expression  
37 maps to a region near exon 1C, which also has patterns of nucleotide variation consistent with  
38 strong positive selection. Finally, we show that the independent evolution of cryptic light  
39 pigmentation in a different species, *P. polionotus*, has been driven by a preference for the same  
40 *Agouti* isoform. Together, these findings present an example of the role of alternative transcript  
41 processing in adaptation and demonstrate molecular convergence at the level of isoform  
42 regulation.

43

44

45

## 46 **Introduction**

47           Understanding the molecular basis of adaptation is one of the principal goals of  
48 evolutionary biology, and considerable efforts have been focused on the contributions of protein-  
49 coding and *cis*-regulatory mutations, and their relative importance, to adaptive variation (Carroll  
50 2005; Hoekstra & Coyne 2007; Stern & Orgogozo 2008). In contrast, the production of multiple  
51 isoforms through the inclusion of different exons in mRNA—known as alternative mRNA  
52 processing—is a major source of genetic variation whose role in phenotypic adaptation has been  
53 comparatively understudied. A single protein-coding gene can produce multiple isoforms either  
54 through alternative splicing, which results in transcripts with different combinations of exons, or  
55 through the use of alternative transcription initiation or termination sites, which generate mRNAs  
56 that differ at the 5' or 3' untranslated regions (UTRs). Alternative processing is ubiquitous  
57 throughout eukaryotic evolution but is more prevalent in higher eukaryotes than in lower ones,  
58 with mammals having the highest genome-wide rate of alternative splicing events (Barbosa-  
59 Morais *et al.* 2012; Merkin *et al.* 2012) and alternative promoter usage (Landry *et al.* 2003; Baek  
60 *et al.* 2007; Shabalina *et al.* 2014). In addition, recent studies of mammalian gene expression  
61 show that transcripts from the majority of protein-coding genes, especially in primates, undergo  
62 alternative processing and generate different isoforms (Blencowe 2006; Kim *et al.* 2008). Thus,  
63 by increasing transcriptomic and hence proteomic diversity, the production of multiple isoforms  
64 through alternative processing has been widely regarded as a key mechanism for generating  
65 phenotypic diversity and organismic complexity, particularly at large taxonomic scales (Barbosa-  
66 Morais *et al.* 2012; Merkin *et al.* 2012).

67           To investigate the role of alternative processing in adaptation between closely related  
68 species, we studied the pigmentation locus *Agouti*, which has been studied as a model for isoform

69 regulation in development (Vrieling *et al.* 1994) and has been repeatedly implicated in the  
70 evolution of adaptive pigmentation (Rieder *et al.* 2001; Nadeau *et al.* 2008). *Agouti* encodes a  
71 secreted paracrine factor that induces pigment-producing cells (melanocytes) in hair follicles to  
72 switch from the synthesis of black pigment (eumelanin) to yellow pigment (phaeomelanin)  
73 during hair growth (Jackson 1994). In the laboratory mouse, *Mus musculus*, the *Agouti* locus  
74 comprises three constitutively transcribed coding exons and four upstream, alternatively  
75 transcribed 5' UTRs, also called non-coding exons (Vrieling *et al.* 1994). Thus, in *M. musculus*,  
76 *Agouti* mRNAs are found as four different isoforms, each containing one to two non-coding  
77 exons upstream of the coding sequence. The “ventral-specific” non-coding exons 1A and 1A' are  
78 expressed in the ventral mesenchyme during embryonic development, whereas the “hair-cycle  
79 specific” non-coding exons 1B and 1C are expressed during hair growth across all regions of the  
80 body (Vrieling *et al.* 1994).

81         Deer mice (genus *Peromyscus*) populations vary tremendously in both color and pattern.  
82 Across populations, there is often a close correspondence between the color of mouse fur and the  
83 local soil, suggesting that color-matching is important for survival (Dice 1940; 1941; Haldane  
84 1948). In both Nebraska and Florida, dark-colored mice have colonized extreme light substrate  
85 environments that appeared in the last 10,000 years — the Sand Hills in Nebraska (Ahlbrandt &  
86 Fryberger 1980; Loope & Swinehart 2000) and the coastal islands in Florida (Campbell 1985;  
87 Stapor & Mathews 1991). In both cases, mice have independently evolved significantly lighter  
88 coats than mice inhabiting darker surrounding substrates (Fig. 1A and 1B), and there is  
89 experimental evidence that visually hunting predators generate strong selection favoring substrate  
90 matching (Dice 1941; Vignieri *et al.* 2010; Linnen *et al.* 2013).

91           In addition to phenotypic convergence, the same gene, *Agouti*, has been shown to play a  
92 significant role in mediating this color adaptation in both Nebraska and Florida populations  
93 (Hoekstra 2006; Hoekstra *et al.* 2006; Linnen *et al.* 2009; Manceau *et al.* 2011; Linnen *et al.*  
94 2013). Specifically, in light-colored *P. maniculatus* inhabiting the Nebraska Sand Hills, referred  
95 to as “wideband” mice, *Agouti* is expressed at higher levels than in their ancestral dark-colored  
96 counterparts (“wild-type” mice). Moreover, measurements in neonatal mice showed that *Agouti*  
97 mRNA in wideband pups is expressed both at higher levels and for longer periods than in wild-  
98 type pups, causing an increase in the width of the pheomelanin band of individual hairs as the  
99 hairs grow, which is largely responsible for their overall lighter color (Linnen *et al.* 2009).  
100 Furthermore, wideband mice display marked differences in additional pigmentation traits (e.g.,  
101 dorso-ventral boundary, ventral color, and tail stripe) that are each significantly associated with  
102 various regions in the *Agouti* locus (Linnen *et al.* 2013). In Florida, changes in *Agouti* and two  
103 other pigmentation loci are responsible for producing the lighter pigmentation phenotypes  
104 displayed by a derived population of beach mice (*P. p. leucocephalus*) inhabiting the coastal sand  
105 dunes, relative to their ancestral mainland conspecifics (*P. p. subgriseus*) (Steiner *et al.* 2007;  
106 Mullen & Hoekstra 2008). Like wideband mice from the Nebraska Sand Hills, Florida beach  
107 mice express *Agouti* at higher levels and in extended spatial domains compared to mainland mice  
108 (Manceau *et al.* 2011).

109           The implication of *Agouti* in the repeated evolution of cryptic coloration in *Peromyscus*,  
110 coupled with its regulatory architecture of alternative 5’ non-coding exons expressed in a region-  
111 and temporal-specific pattern, make this an excellent system in which to study the role of isoform  
112 regulation in evolution and adaptation. Here, we first characterize the *Agouti* isoforms present in  
113 *Peromyscus* skin and examine their patterns of expression during hair growth. We then use *in*

114 *vitro* experiments to study transcript-specific functional differences. Next, we use a  
115 phenotypically variable population in the Sand Hills to map variation in overall *Agouti* mRNA  
116 expression to the *Agouti* locus and to examine patterns of nucleotide variation for signatures of  
117 selection on the different isoforms. Finally, we study the expression of *Agouti* isoforms in Florida  
118 *P. polionotus* to establish whether the changes in isoform regulation seen in Nebraska *P.*  
119 *maniculatus* are shared with its sister species that independently evolved light coloration as an  
120 adaptation to the local environment.

121

## 122 **Materials and Methods**

### 123 *Mice*

124 Lab mice strains: We originally purchased wild-derived strains from the *Peromyscus* Genetic  
125 Stock Center (University of South Carolina) and now maintain them at Harvard University. As  
126 representatives of the mice found in Nebraska, we used *P. maniculatus* wild-type ( $a^+/a^+$ ) and *P.*  
127 *maniculatus* heterozygous for the wideband allele and a non-agouti allele ( $a^{wb}/a^-$ ) (Linnen *et al.*  
128 2009; 2013). The non-agouti allele has a 125-kb deletion that removes the entire regulatory  
129 region and first coding exon, resulting in a complete loss of expression (Kingsley *et al.* 2009);  
130 thus, *P. maniculatus*  $a^{wb}/a^-$  are effectively hemizygous for the wideband allele. For many of the  
131 experiments, however, we also generated wideband mice homozygous for the wideband allele  
132 ( $a^{wb}/a^{wb}$ ). As representatives of mice in Florida, we used *P. polionotus subgriseus* mainland mice  
133 (homozygous for the *Agouti* Dark allele [*Agouti* *DD*]) and *P. p. subgriseus* mainland mice  
134 homozygous for the *Agouti* Light beach allele (*Agouti* *LL*), hereafter referred to as *Agouti* *LL*  
135 mice (Manceau *et al.* 2011).

136

137 Wild-caught mice: Mice used for the association and selection studies were collected as described  
138 in (Linnen *et al.* 2009) from two Sand Hills sites located <15km apart in Cherry County,  
139 Nebraska (site 1: Schlagel Creek Wildlife Management Area, N=62; site 2: Ballard's Marsh  
140 Wildlife Management Area, N=29).

141

#### 142 *Quantification of phenotype and soil coloration*

143 We prepared flat skins of mice from the strains mentioned above using standard museum  
144 protocols. In addition, we included flat skins from *P. p. leucocephalus* beach mice deposited in  
145 the Museum of Comparative Zoology at Harvard University. For all the specimens, we quantified  
146 dorsal coloration using a USB4000 spectrophotometer and a PX-2 pulsed xenon light source, and  
147 recorded readings using the program SpectraSuite (Ocean Optics). Using a reflectance probe with  
148 a shield cut at a 45° angle (to minimize diffuse reflection), we took and averaged three  
149 measurements of the dorsal skin of each mouse. Reflectance readings were limited to the 300-700  
150 nm range, which represents the visible spectrum of most visual predators (Bennet & Lamoreux  
151 2003; Mullen & Hoekstra 2008). We then generated color variables using the program CLRvars  
152 (Montgomerie R, 2008, CLR, version 1.05; available at  
153 <http://post.queensu.ca/~mont/color/analyze.html>) and performed principle component analysis in  
154 R (R: A Language and Environment for Statistical Computing, R Core Team, 2014,  
155 <http://www.R-project.org/>) using prcomp.

156 To quantify variation in soil color, we collected soil samples from four different localities  
157 representing the natural habitats of the mice used in this study: Schlagel Creek Wildlife  
158 Management Area, Cherry County, Nebraska (*P. maniculatus* wideband mice); Sparks, Cherry  
159 County, Nebraska (*P. maniculatus* wild-type mice); Santa Rosa Island, Okaloosa County, Florida

160 (*P. p. leucocephalus* beach mice); and Graceville, Jackson County, Florida (*P. p. subgriseus*  
161 mainland mice). We quantified soil reflectance with a spectrophotometer as described above.

162

### 163 *Rapid Amplification of cDNA Ends (RACE)*

164 We sampled dorsal and ventral skin of *P. maniculatus* wideband ( $a^{wb}/a^-$ ) and wild-type  
165 strains and used 5' rapid amplification of cDNA ends (RACE) to identify the *Agouti* isoforms  
166 present in *Peromyscus*. To explore and characterize the full diversity of *Agouti* isoforms, we  
167 sampled tissue from pups (postnatal day 4 [P4]), as previously done in *Mus* (Vrieling *et al.* 1994),  
168 as well as from adults (> 60 days), since the pelage in adult *Peromyscus* differs from juveniles  
169 (Fig. S1, supporting information; Golley *et al.* 1966) and therefore may contain additional  
170 transcripts not found during the initial hair cycle.

171 For each sample, we extracted RNA from skin taken from 1-4 individuals. We dissected  
172 skin immediately after sacrifice and stored it in RNeasy Lysis Buffer (Qiagen) at 4 °C. We extracted total  
173 RNA using the Qiagen RNeasy Fibrous Tissue Kit. To maximize tissue disruption and RNA  
174 yield, we performed two 2-min homogenizations at 50Hz using a 5mm steel ball and a  
175 TissueLyser LT (Qiagen). Following extraction, we quantified RNA using a Quant-it RNA kit and  
176 a Qubit fluorometer (Invitrogen). From total RNA, we then purified mRNA using NucleoTrap  
177 mRNA kits (Clontech Laboratories, Inc) and quantified mRNA using fluorescence as described  
178 above.

179 Following mRNA purification, we used the SMARTer RACE cDNA Amplification Kit  
180 (Clontech) to prepare 5'-RACE ready cDNA and perform RACE PCRs. To increase the  
181 specificity of the 5' RACE PCRs, we performed a nested PCR. For the first RACE PCR, we used  
182 the kit-provided UPM primer in conjunction with a primer located in the exon 4 of *Agouti*



183 (“GSP1” sequence: GTTGAGTACGCGGCAGGAGCAGACG). For the nested PCR, we used  
184 the kit-provided NUPA primer in conjunction with a primer located upstream of GSP1  
185 (“NGSP1C”, sequence: TCTTCTTCAGTGCCACAATAGAAACAG). Following the second  
186 PCR, we gel-purified any obvious bands using a Qiaquick gel extraction kit (Qiagen). We then  
187 ligated the resulting DNA to vectors and transformed competent cells using the pGEMt easy  
188 Vector kit (Promega).

189       Following transformation, we performed colony PCRs using Qiagen TAQ and M13F and  
190 M13R primers. PCR products were purified enzymatically using Exonuclease I and Shrimp  
191 Alkaline Phosphatase (USB). Purified PCR products were sequenced on an ABI 3730xl Genetic  
192 Analyzer at Harvard University’s Genomics Core facility. In total, we obtained sequences from  
193 24-89 *Agouti* clones from each of eight distinct genotype/stage/tissue combinations.

194

#### 195 *Quantitative PCR (qPCR)*

196 Lab strains: We performed gene expression analyses in *P. maniculatus* wideband ( $a^{wb}/a^{wb}$ ), *P.*  
197 *maniculatus* wild-type, *P. polionotus subgriseus*, and *Agouti LL* mice. We used samples from  
198 both pup and adult stages. We extracted RNA from dorsal and ventral tissue as indicated above,  
199 isolated mRNA from total RNA using the NucleoTrap mRNA Kit (Clontech), and directly  
200 synthesized cDNA using qScript cDNA SuperMix (Quanta BioSciences). We performed all  
201 reactions in triplicate using PerfeCta SYBR Green FastMix (Quanta BioSciences) and calculated  
202 relative expression between samples using the  $2^{-\Delta\Delta C_T}$  method (Livak & Schmittgen 2001) using  
203  $\beta$ -actin as a reference gene.

204       To measure levels of total *Agouti*, we used the primers Agouti-Exon2-F and Agouti-  
205 Exon3-R to amplify all transcripts containing the *Agouti* coding sequence. To measure levels of

206 individual isoforms, we paired a forward primer within the noncoding exon (1C-F, 1D-F, or 1E-  
207 F, respectively) with a reverse primer in the coding region (Agouti-Exon2-R). We amplified  $\beta$ -  
208 actin using the primers  $\beta$ -actin-Pero-F and  $\beta$ -actin-Pero-R. Primer sequences can be found in  
209 Supplementary Table 1.

210  
211 Wild-caught mice: We removed a 5mm skin biopsy from the dorsum, preserved tissue in  
212 RNAlater, and extracted RNA as indicated above. We synthesized cDNA and performed qPCR  
213 reactions to measure total *Agouti* and  $\beta$ -actin as described for lab strains.

214

#### 215 *Dorsal depilation*

216 It is well established that *Agouti* expression is tightly linked to hair growth (Vrieling *et al.*  
217 1994). Contrary to newborn pups, in which hair emerges simultaneously across the body, hair  
218 follicles of adult mice are desynchronized with respect to the hair cycle (Muller-Rover & Paus  
219 2001). Thus, the quantification of *Agouti* expression in adult dorsal skin represents an average  
220 expression level across many follicles that are each at different stages in the cycle. To understand  
221 the detailed dynamics of *Agouti* isoform expression in adults, we depilated the backs of adult  
222 wild-type and wideband mice, a procedure that resets and synchronizes the hair follicle program  
223 (Paus & Cotsarelis 1999) and examined isoform expression at different time points. We  
224 anesthetized adult *P. maniculatus* wideband and wild-type mice by performing intraperitoneal  
225 injections with a cocktail of Ketamin/Xylazine (0.1mL/20g mouse wt) and depilated a small  
226 patch ( $\sim 1\text{cm}^2$ ) in the dorsum using a melted beeswax/resin mixture. After the procedure, we  
227 applied topical Lidocaine for pain relief every hour for the next eight hours.

228

229 *mRNA stability assays*

230 Our RACE experiment revealed that the dorsal skin in *Peromyscus* expresses three *Agouti*  
231 isoforms (1C, 1D, and 1E) simultaneously, differing only in the first, non-coding exon. To  
232 determine whether there were differences in mRNA half-life, we cloned each of the three  
233 isoforms from *P. maniculatus* wild-type into a pHAGE-CMV-eGFP-W expression vector such  
234 that the noncoding exon and *Agouti* coding sequence replaced the eGFP coding sequence. We  
235 used Lipofectamine (Life Technologies) to transfect plasmids into human embryonic kidney  
236 (HEK293) cells, which lack endogenous *Agouti* expression, and forty hours after transfection  
237 halted transcription by treating cells with 10 µg/ml actinomycin D (Sigma) in DMSO. As a  
238 control, we treated cells with an equal volume of 100% DMSO. At zero, two, or four hours after  
239 actinomycin treatment, we collected cells in TRIzol reagent (Invitrogen) and extracted RNA  
240 using the Direct-zol RNA Mini Kit (Zymo Research). We then performed qPCR as described  
241 above, using primers common to all constructs (i.e., located in exons 2 and 3): *Agouti*-Exon2-F  
242 and *Agouti*-Exon3-R to amplify *Agouti* and  $\beta$ -actin-Human-F and -R to amplify endogenous  $\beta$ -  
243 actin. Primer sequences can be found in Supplementary Table 1. Three replicates were used for  
244 each condition and time point. *Agouti* expression in actinomycin-treated cells at each time point  
245 was calculated as a percentage of *Agouti* expression in DMSO-treated cells at the same time point  
246 using the  $2^{-\Delta\Delta C_T}$  method.

247

248 *Luciferase assays*

249 To establish whether the non-coding exons of the isoforms expressed in the dorsal skin of  
250 *Peromyscus* showed differences in translation, we generated luciferase reporter plasmids by  
251 cloning each of the three noncoding exons (1C, 1D, or 1E) from both *P. maniculatus* wildband

252 and wild-type strains into a 5' UTR reporter vector (pLightSwitch\_5UTR; Switchgear Genomics)  
253 upstream of the luciferase coding sequence and downstream of the ACTB promoter. We  
254 generated mutated 1D reporter plasmids from the wild-type 1D plasmid using the Q5 Site-  
255 Directed Mutagenesis Kit (New England BioLabs). We transfected plasmids into human  
256 embryonic kidney (HEK293) cells using Lipofectamine (Invitrogen), with six replicate  
257 transfections per construct. Forty-eight hours after transfection, we measured luminescence as a  
258 readout of protein production using a microplate reader (SpectraMax L). We quantified  
259 transcription from each plasmid as follows: we collected six replicates of transfected cells in  
260 TRIzol reagent (Invitrogen) and extracted RNA using the Direct-zol RNA Mini Kit (Zymo  
261 Research). We then carried out qPCR as described above using the primer pairs Luciferase-F and  
262 -R, and  $\beta$ -actin-Human-F and -R. Primer sequences can be found in Supplementary Table 1.

263

#### 264 *Association tests*

265 Previous work has shown that different color traits, all of which are perfectly correlated  
266 with *Agouti* genotype in the lab, map to distinct regions in the *Agouti* locus (Linnen *et al.* 2013).  
267 Similarly, any associations between *Agouti* genotype, *Agouti* expression level, and color  
268 phenotype in our laboratory mice could either be due to direct functional connections (i.e., a  
269 casual variant leads to a lighter coat via increased expression) or to genetic linkage. To determine  
270 whether color phenotypes and *Agouti* expression co-localize to the same *Agouti* regions, we  
271 measured *Agouti* expression (overall *Agouti* and isoform 1C) as described above in 91 mice that  
272 had been genotyped and phenotyped for color traits as described in Linnen *et al.* 2013. After  
273 discarding three samples with degraded RNA, our final sample size for the expression association  
274 analysis was 88 mice. To test for an association between *Agouti* genotypes and *Agouti*

275 expression, we performed single-SNP linear regressions in PLINK v1.07 (Purcell *et al.* 2007). To  
276 control for population structure, we included four significant genetic principal components,  
277 estimated from genome-wide markers, as covariates in the analysis. Prior to analysis, we  
278 performed a normal-quantile transformation on the expression data in R (Guan & Stephens  
279 2011). To correct for multiple testing, we used the step-up method for controlling the False  
280 Discovery Rate, which we set to a threshold of 10% (Benjamini & Hochberg 1995).

281

## 282 **Results**

### 283 ***Peromyscus* expresses two *Agouti* isoforms not previously identified in *Mus***

284 RACE from *P. maniculatus* ventral samples revealed the presence of the ventral specific  
285 isoforms 1A, 1A', and 1A1A' (an isoform containing both the 1A and 1A' exons), and the hair-  
286 cycle specific 1C, similar to what is seen in *M. musculus* (Vrieling *et al.* 1994). However, none of  
287 our clones contained sequences corresponding to exon 1B found in *M. musculus* (Vrieling *et al.*  
288 1994) (Fig. 2A and Fig. S2, supporting information). Our RACE experiment in dorsal skin  
289 revealed that, in addition to hair-cycle specific isoform 1C, *P. maniculatus* expressed two  
290 additional isoforms of *Agouti*, hereafter referred to as 1D and 1E, which had not been previously  
291 reported in *M. musculus* (Fig. 2A,B and Fig. S2, supporting information). Like the previously  
292 described *Agouti* isoforms, 1D and 1E each consist of an alternate non-coding exon (exon 1D or  
293 1E), followed by three coding exons (exons 2, 3, and 4), which are shared by all *Agouti* isoforms.  
294 Both exons 1D and 1E are located downstream of exons 1A and 1C in the *Agouti* locus (Fig. 2B)  
295 and show polymorphisms between wideband and wild-type *P. maniculatus* (Fig. S2, supporting  
296 information). To confirm the absence of isoform 1B in ventral/dorsal tissue and of isoforms 1D  
297 and 1E in ventral tissue, as indicated by our RACE experiments, we carried out qPCR using

298 isoform-specific primers in the respective tissues and did not detect any expression of these  
299 transcripts. Together, our results indicate that *P. maniculatus* expresses some, but not all, of the  
300 *Agouti* isoforms previously described in *M. musculus* (the ventral-specific 1A, 1A', 1A1A' and  
301 the hair cycle specific 1C), and also contains two novel dorsal-specific isoforms that had not been  
302 described previously (1D and 1E).

303

304 **Differences in *Agouti* mRNA levels between wideband and wild-type mice are driven by**  
305 **upregulation of isoform 1C**

306 As mentioned above, wideband and wild-type mice differ markedly in their dorsal  
307 coloration; therefore, we focused here on analyzing the isoforms present in the dorsum. Our  
308 RACE experiments demonstrated that the dorsal skin of *P. maniculatus* expresses at least three  
309 different *Agouti* transcripts (1C, 1D, and 1E) simultaneously, but it remained unknown whether  
310 all three contribute to the increase in *Agouti* mRNA levels seen in wideband mice relative to  
311 wild-type ones (Linnen *et al.* 2009) or whether this difference is driven only by a subset. To  
312 answer this question, we used qPCR to measure the relative expression of total *Agouti* mRNA  
313 and each of its isoforms in dorsal skin of wideband and wild-type *P. maniculatus*. The expression  
314 of overall *Agouti* was 18-fold higher in wideband mice than in wild-type mice ( $P = 0.031$ , two-  
315 tailed *t*-test) (Fig. 3A). We then measured isoform-specific expression and found that isoform 1C  
316 was approximately 17-fold higher in wideband than in wild-type mice (Fig. 3B;  $P = 0.049$ , two-  
317 tailed *t*-test). In contrast, we did not observe significant differences in mRNA levels between the  
318 two strains in expression of isoforms 1D or 1E ( $P = 0.075$  and  $P = 0.257$ , respectively; two-tailed  
319 *t*-tests) (Fig. 3B).

320 We next quantified total *Agouti* and isoform-specific expression at different time points  
321 following dorsal depilation in order to examine the dynamics of *Agouti* isoform expression  
322 during hair growth. In both strains, total *Agouti* is expressed initially at low levels, peaks at day 7  
323 after depilation, and then decreases (Fig. 3C), a pattern that mirrors the expression of *Agouti*  
324 during the first hair cycle in pups (Linnen *et al.* 2009). Total *Agouti* levels in wideband mice  
325 were higher than in wild-type mice at days 3, 7, and 9 after depilation ( $P = 0.0011$ ,  $P = 0.0228$ ,  
326 and  $P = 0.0006$ , respectively, two-tailed *t*-tests) (Fig. 3C). When we measured transcript-specific  
327 mRNA levels in wideband and wild-type mice, we found that the expression of isoform 1C  
328 closely matched the expression of overall *Agouti*, peaking at day 7, and differing from wild-type  
329 mice also at days 3, 7, and 9 ( $P = 0.0012$ ,  $P = 0.0109$ , and  $P = 0.0003$ , respectively, two-tailed *t*-  
330 tests) (Fig. 3D). In contrast, isoform 1D and 1E did not differ between wideband and wild-type  
331 mice at any time points, with one exception: expression of 1E differed at day 5 ( $P = 0.0166$ , two-  
332 tailed *t*-test) (Fig. 3D).

333 To determine whether the same patterns occur in neonates, we measured isoform-specific  
334 mRNA levels at postnatal day 4, which corresponds to the stage in the first hair cycle when  
335 *Agouti* expression is highest (Linnen *et al.* 2009). Quantitative PCR confirmed that wideband  
336 mice express higher levels of total *Agouti* mRNA relative to wild-type mice ( $P = 0.00097$ , two-  
337 tailed *t*-test) (Fig. S3). In addition, like in adults, isoform 1C expression was significantly higher  
338 in wideband mice than in wild-type ( $P = 0.00031$ , two-tailed *t*-test), whereas there were no  
339 significant differences between the two strains in the expression of isoforms 1D or 1E ( $P =$   
340  $0.1575$  and  $P = 0.3231$ , respectively, two-tailed *t*-tests). Together, the results of our  
341 measurements of isoform-specific *Agouti* mRNA levels in adults and pups, both in skin  
342 containing hair follicles at multiple stages of the hair cycle and skin with hair follicles that are

343 synchronized, indicate that the marked increase in *Agouti* expression seen in wideband mice,  
344 relative to wild-type mice, is primarily driven by upregulation of isoform 1C.

345

### 346 ***Agouti* isoforms differ in luciferase production**

347 To investigate functional variation associated with different *Agouti* isoforms, we  
348 measured their half-lives *in vitro*. After halting transcription from a vector expressing each  
349 isoform, we used qPCR to measure mRNA levels at different time points during the transcript  
350 decay that followed and did not detect any statistically significant differences between the half-  
351 lives of the three isoforms ( $P = 0.123$ , one-way ANCOVA) (Fig. S4). Thus, our experiment  
352 indicates that the three alternative exons simultaneously expressed in *Peromyscus* dorsal skin do  
353 not have measurable effects on the stability of the *Agouti* transcripts.

354 To determine if the isoforms differed in their regulation of translation, we next examined  
355 whether each of the alternative exons affects the amount of protein produced from a luciferase  
356 transcript. Relative to a control vector expressing a luciferase coding sequence without a 5'UTR,  
357 a vector carrying exon 1C showed a marked increase in luciferase activity ( $P = 0.039$  [wideband  
358 sequence] and  $P = 0.00013$  [wild-type sequence], two-tailed *t*-tests), whereas 1D showed a  
359 marked decrease ( $P = 4.4 \times 10^{-5}$  [wideband sequence] and  $P = 0.00022$  [wild-type sequence],  
360 two-tailed *t*-tests). Exon 1E from wideband mice was not significantly different from the control  
361 ( $P = 0.2577$  [wideband sequence], two-tailed *t*-test) whereas exon 1E from wild-type mice  
362 showed increased luciferase activity compared to the control ( $P = 0.0082$ , two-tailed *t*-test) (Fig.  
363 4A). Importantly, we found that mRNA levels did not differ between any of the vectors ( $P =$   
364  $0.379$ , ANOVA), demonstrating that differences in translation, not transcription, are exclusively  
365 responsible for the differences in luminescence (Fig. 4B).



366 To further dissect the mechanisms underlying the differences in protein translation  
367 observed between the isoforms, we examined their sequences in more detail and found that exon  
368 1D contains start codons (ATGs) upstream of the *Agouti* start codon (three in the wild-type 1D  
369 sequence and two in the wideband sequence) (Fig. 4C and Fig. S2). Upstream start codons have  
370 been shown to decrease translation efficiency by recruiting ribosomes away from the start codon  
371 (Kozak 2002; Rosenstiel *et al.* 2007; Song *et al.* 2007; Medenbach *et al.* 2011). To determine  
372 whether this can explain the reduced translation of isoform 1D, we mutated the ATG sites to  
373 ACG in the *P. maniculatus* wild-type sequence and quantified the relative amount of luciferase  
374 produced (Fig. 4C). When we mutated and tested each ATG site individually, we found that  
375 mutating site 1 led to a significant increase in luciferase production relative to the wild-type 1D  
376 sequence ( $P=1.268 \times 10^{-8}$ , two-tailed *t*-test), mutating site 2 resulted in no significant difference  
377 ( $P = 0.5966$ , two-tailed *t*-test), and mutating site 3 led to a significant reduction ( $P=1.6739 \times 10^{-6}$ ,  
378 two-tailed *t*-test) (Fig. 4C). Thus, the different ATG sites in exon 1D differ in their ability to  
379 modulate luciferase production, possibly due to differences in their surrounding sequences  
380 (Kozak 1999; 2002). When we mutated the three ATG sites simultaneously, luciferase production  
381 from the mutant transcript was significantly higher than that from the wild-type 1D transcript ( $P$   
382 = 0.000015, two-tailed *t*-test) and did not differ from the control ( $P = 0.092$ , two-tailed *t*-test),  
383 indicating that the upstream start codons contained within exon 1D are responsible for the  
384 marked decrease in translation from this transcript. Together, these experiments demonstrate that  
385 the non-coding exons of the *Agouti* isoforms expressed in the dorsal skin of *P. maniculatus* differ  
386 in their regulation of protein translation, with non-coding exon 1C generating the highest level of  
387 luciferase, relative to the control, and non-coding exon 1D with its multiple ATG sites generating  
388 the lowest.

389

390 **Genetic variation near exon 1C is associated with dorsal color and *Agouti* expression in**  
391 **wild-caught mice**

392 To evaluate evidence for exon 1C's contribution to adaptive coat color variation in natural  
393 populations, we examined patterns of genotype-color associations (from Linnen *et al.* 2013) and  
394 genotype-expression associations (this study) across the 180-kb *Agouti* locus in a phenotypically  
395 variable population of *P. maniculatus* (Linnen *et al.* 2009). Here, we focus here on dorsal  
396 brightness because we expect that this trait (1) has a large impact on substrate matching, and (2)  
397 has the potential to be strongly influenced by the hair-cycle isoform 1C due to *Agouti*'s direct  
398 impact on pigment deposition in hairs. For dorsal brightness, we previously identified a peak in  
399 association centered directly on exon 1C (Fig. 5A). Intriguingly, we also observed a peak in  
400 association with expression at the same location (Fig. 5B). We note, however, that these  
401 expression data were generated using an assay that detects all *Agouti* isoforms. Nevertheless,  
402 when we evaluated the correlation between genotype and isoform 1C expression using 1C-  
403 specific probes, the exon 1C SNPs remained significantly associated (SNP 109,902,  $P = 0.0026$ ;  
404 SNP 109,882,  $P = 0.011$ ). Although the lack of polymorphic positions in exon 1C that are derived  
405 in wideband mice suggests that the causal mutation is not in exon 1C itself, these association  
406 mapping data strongly suggest that there is a causal mutation somewhere in its immediate vicinity  
407 that simultaneously increases both expression of isoform 1C and, as a consequence, dorsal  
408 brightness.

409

410 **Exon 1C has undergone strong positive selection**

411           Although we have not yet identified the causal mutation, the results of our association  
412 mapping indicate that it should be in strong linkage disequilibrium with variants located near  
413 exon 1C (Fig. 5A, 5B). In this way, we can use the association mapping results to define light and  
414 dark haplotypes (i.e., those that contain the causal mutation and those that do not). If the light  
415 mutation has undergone positive selection in the light Sand Hills habitat, we expect to see  
416 signatures of selection on the light, but not dark, haplotypes. To evaluate evidence of selection on  
417 light and dark haplotypes, we previously (Linnen et al. 2013) used the composite-likelihood  
418 method implemented in Sweepfinder (Nielsen *et al.* 2005), a method that compares, for each  
419 location, the likelihood of the data under a selective sweep to the likelihood under no sweep. The  
420 significance of the CLR test statistic is then determined via neutral simulations. In our case,  
421 neutral simulations were conducted under a demographic model estimated from genome-wide  
422 SNPs (as described in Linnen *et al.* 2013). Figure 5C depicts the resulting likelihood surfaces and  
423 significance thresholds for light and dark haplotypes across a ~20-kb window centered on exon  
424 1C (Fig. 5A, 5B). This analysis indicates strong evidence of selection on the light, but not dark,  
425 haplotypes in this region of the *Agouti* locus. Together with the results of our association  
426 mapping, these analyses indicate that a mutation(s) in the immediate vicinity of exon 1C  
427 contributes to dorsal color and is currently undergoing strong positive selection ( $s = 0.14$ ; Linnen  
428 *et al.* 2013).

429

### 430 **Evolutionary convergence of isoform regulation in *Peromyscus***

431           Our results show that *Agouti* isoform 1C is specifically upregulated in the light-colored *P.*  
432 *maniculatus* wideband mice from the Nebraska Sand Hills relative to the dark-colored ancestral  
433 population. We next investigated whether similar regulatory mechanisms are observed in another

434 population of *Peromyscus* that independently underwent selection for light pigmentation. We  
435 examined patterns of isoform expression in *Agouti LL* mice and compared them to mainland *P. p.*  
436 *subgriseus* (Manceau *et al.* 2011). *Agouti LL* mice are significantly lighter than mainland mice  
437 but not as light as beach mice, which also differ from mainland mice at two additional  
438 pigmentation loci (Fig. S5). Quantitative PCR revealed that expression of *Agouti* was  
439 approximately two-fold higher in *Agouti LL* mice compared to mainland mice ( $P = 0.0184$ , two-  
440 tailed *t*-test; Fig. 6A). Measurements of *Agouti* isoform-specific mRNA levels revealed that there  
441 were no significant differences in the expression of isoforms 1D or 1E between *Agouti LL* and  
442 mainland mice ( $P = 0.259$  and  $P = 0.111$ , respectively; two-tailed *t*-tests). In contrast, we found  
443 that isoform 1C was significantly upregulated in *Agouti LL* mice compared to mainland mice ( $P$   
444  $= 0.0279$ , two-tailed *t*-test; Fig. 6A). Together, our measurements of mRNA levels demonstrate  
445 that the increase in *Agouti* expression seen in *P. polionotus* homozygous for the *Agouti* allele  
446 found in beach mice, relative to those carrying the ancestral allele, is produced primarily by a  
447 specific upregulation of isoform 1C, a pattern that matches what we observed in *P. maniculatus*  
448 (Fig. 3A).

449

## 450 **Discussion**

451 The *Agouti* locus, which contains multiple independently regulated transcription start sites  
452 and has been linked to pigment variation in *Peromyscus* (Steiner *et al.* 2007; Mullen & Hoekstra  
453 2008; Linnen *et al.* 2009; 2013), other mammals (e.g., Rieder *et al.* 2001; Voisey *et al.* 2001;  
454 Schmutz & Berryere 2007; Seo *et al.* 2007, and other vertebrates (e.g., Nadeau *et al.* 2008),  
455 represents an ideal study system to understand the importance of alternative transcript processing  
456 in adaptation to new environments. While different isoforms have been well studied in *Mus*

457 *musculus*, in *Peromyscus* we both identify new dorsally expressed isoforms (1D and 1E) as well  
458 as the lack of expression of 1B across the body. These differences are consistent with genome-  
459 wide surveys of isoform variation, which find rapid evolution of isoform usage between species  
460 (Barbosa-Morais *et al.* 2012; Merkin *et al.* 2012).

461 In this study, we also find that although the dorsal skin of *Peromyscus* mice expresses  
462 three different *Agouti* isoforms simultaneously, differing only in their first non-coding exon (1C,  
463 1D, and 1E), the marked differences in overall *Agouti* expression seen between *P. maniculatus*  
464 strains (wideband vs. wild-type) and between *P. polionotus* subspecies (*P. p. leucocephalus* vs.  
465 *P. p. subgriseus*) are exclusively driven by one of the isoforms (1C). Thus, populations of *P.*  
466 *maniculatus* and *P. polionotus* experiencing selection pressures for light dorsal pigmentation  
467 have independently converged not only on the same gene, but also on the specific upregulation of  
468 the same isoform. One explanation for this result is that exon 1C has inherent sequence properties  
469 that result in large amount of protein (relative to other *Agouti* isoforms), indicating that such  
470 convergence in isoform upregulation may be driven by selection for the molecular mechanism  
471 promoting the highest amount of *Agouti* protein production. In support of this, we find that in a  
472 admixed population in the Sand Hills, dorsal color and *Agouti* gene expression is significantly  
473 associated with genetic variation around exon 1C and that this region shows a pattern of strong  
474 selection.

475 Given the patterns of phenotypic and gene expression association as well as the signatures  
476 of selection we have reported here and elsewhere (Linnen *et al.* 2013), it is likely that at least one  
477 causal polymorphism is located somewhere in the vicinity of exon 1C, with the most promising  
478 locations within 2.5kb upstream or downstream of the exon (Fig. 5). An important goal of future  
479 work is to characterize and functionally test all variants in this region, including indels and low-

480 coverage SNPs that may have been absent in the capture-based genotype data. In the case of *P.*  
481 *polionotus* beach mice, despite the fact that selection on pigmentation is strong ( $s = 0.5$ ; Vignieri  
482 *et al.* 2010) and *Agouti* is known to be a major contributor to pigment differences (Steiner *et al.*  
483 2007; Mullen & Hoekstra 2008), any inferences of positive selection for regions in or around  
484 exon 1C are confounded by the unique demographic history of this species, which has  
485 experienced severe population bottlenecks associated with colonization events from the mainland  
486 to novel habitats in the Gulf Coast (Thornton *et al.* 2007; Domingues *et al.* 2012; Poh *et al.*  
487 2014). Thus, it is not possible to evaluate with certainty whether specific regions in the *Agouti*  
488 locus show signatures of similar selective pressures between *P. maniculatus* and *P. polionotus*.

489 We find that the dorsal skin of *Peromyscus* expresses two isoforms that are not found in  
490 *Mus* or in other species (1D and 1E). However, it is unlikely that they have played a major role in  
491 the evolution of light coloration in *Peromyscus* because their expression patterns do not differ  
492 between the light and dark-colored strains examined here and do not follow the pulse of *Agouti*  
493 expression that occurs during hair growth (Vrieling *et al.* 1994). From a functional perspective,  
494 isoform 1D contains sequences that cause a marked repression of protein translation, so it is not  
495 surprising that this particular exon does not constitute a target for selection on lighter phenotypes,  
496 and does not show differences in expression between *P. maniculatus* strains or *P. polionotus*  
497 subspecies. In the case of isoform 1E, our functional experiments suggest that the sequence of  
498 exon 1E found in wild-type *P. maniculatus* increases protein translation, whereas the exon 1E  
499 sequence found in wideband *P. maniculatus* does not impact translation. The two strains'  
500 sequences differ only at the end of the exon, where wild-type *P. maniculatus* has a six base pair  
501 deletion (Fig S2, supporting information). Importantly, however, the exon 1E sequence found in  
502 an outgroup to the two strains, *P. maniculatus rufinus*, is identical to that found in wideband *P.*

503 *maniculatus*, indicating that the deletion found in the wild-type 1E sequence is in fact derived and  
504 arose after the split between wild-type and wideband populations. Thus, in the common ancestor  
505 of wild-type and wideband mice, exon 1C—and not exon 1E—would have been the only non-  
506 coding exon that promoted increased protein production. The driving forces underlying the  
507 evolution and maintenance of isoforms 1D and 1E in *Peromyscus* populations are yet unknown.

508         Since *Agouti*'s function is primarily linked to regulating pigment-type switching in  
509 melanocytes, changes affecting this gene are less likely to have negative pleiotropic  
510 consequences and thus, selection pressures for eliminating particular transcripts from populations  
511 may be relaxed. Alternatively, isoforms 1D and 1E could be playing a role in other aspects of  
512 *Agouti*'s function independent of its interaction with melanocytes that was not uncovered by our  
513 experiments, such as secretion and/or transport from the dermal papillae. Examining  
514 presence/absence and expression patterns of these isoforms in additional *Peromyscus* species and  
515 populations may shed light on some of these possibilities.

516         The findings presented here also bear on the molecular basis of convergent evolution. It  
517 has long been a topic of contention in evolutionary biology whether similar phenotypes that  
518 evolve independently tend to be generated by similar or different molecular changes (e.g.,  
519 Manceau et al. 2010; Stern 2013; Rosenblum et al. 2014). Some studies of convergent  
520 phenotypes have found that they are controlled by independent mutations at different loci (e.g.,  
521 Steiner et al. 2009; Weng et al. 2010; Kowalko et al. 2013) while others have found that similar  
522 evolutionary pressures on two populations can result in changes at the same gene (e.g., Protas et  
523 al. 2006; Woods et al. 2006; Chan et al. 2010; Reed et al. 2011), and in some cases, even the  
524 same amino acid substitutions (e.g., Zhen et al. 2012; van Ditmarsch et al. 2013). In the case of  
525 convergent pigmentation phenotypes in *Peromyscus*, not only is the same locus targeted, but the

526 same pattern of isoform regulatory change has occurred—highlighting the various ways in which  
527 convergent evolution can occur at the molecular level.

528 Our results add an additional layer to the known mechanisms by which *Agouti* can play a  
529 role in the evolution of pigmentation phenotypes in *Peromyscus*. *Cis*-regulatory changes in  
530 *Agouti* are known to contribute to both the wideband phenotype in *P. maniculatus* (Linnen *et al.*  
531 2009; 2013) and the beach mouse phenotype in *P. polionotus* (Steiner *et al.* 2007). In addition, an  
532 amino acid change in the *Agouti* coding sequence of *P. maniculatus* wideband mice is strongly  
533 associated with light phenotypes and shows strong signatures of selection (Linnen *et al.* 2009;  
534 2013). Here, we find that in addition to these changes, differences in *Agouti* isoform regulation  
535 have also been involved in the evolution of adaptive pigmentation variation in this genus. It is  
536 clear that alternative transcript processing provides a virtually limitless substrate for the  
537 generation of functional and structural transcriptomic and proteomic diversity, and genomic  
538 studies analyzing rates of alternative splicing and alternative promoter usage have revealed the  
539 importance of this mechanism in originating diversity at large taxonomic scales (Barbosa-Morais  
540 *et al.* 2012; Merkin *et al.* 2012). Our study, by providing an example that links alternative mRNA  
541 processing with adaptation to a known selective pressure in different subspecies within a single  
542 genus, highlights the importance of this mechanism as a driver of diversification and adaptation  
543 at smaller taxonomic scales as well.

544

545

## 546 **References**

547 Ahlbrandt TS, Fryberger SG (1980) Eolian deposits in the Nebraska Sand hills. *US Geological*  
548 *Survey Professional Paper*, **1120A**, 1–24.



- 549 Baek D, Davis C, Ewing B, Gordon D, Green P (2007) Characterization and predictive discovery  
550 of evolutionarily conserved mammalian alternative promoters. *Genome Research*, **17**, 145–  
551 155.
- 552 Barbosa-Morais NL, Irimia M, Pan Q *et al.* (2012) The evolutionary landscape of alternative  
553 splicing in vertebrate species. *Science*, **338**, 1587–1593.
- 554 Benjamini Y, Hochberg Y (1995) Controlling the false discovery rate: a practical and powerful  
555 approach to multiple testing. *Journal of the Royal Statistical Society Series B*, **57**, 289–300.
- 556 Bennet D, Lamoreux ML (2003) The color loci of mice – a genetic century. *Pigment Cell*  
557 *Research*, **16**, 333–344.
- 558 Blencowe BJ (2006) Alternative splicing: new insights from global analyses. *Cell*, **126**, 37–47.
- 559 Campbell KM (1985) *Campbell: Geology of Sarasota County, Florida*. Florida Geological  
560 Survey Open File.
- 561 Carroll SB (2005) Evolution at two levels: on genes and form. *PLoS Biology*, **3**, e245.
- 562 Chan YF, Marks ME, Jones FC, Villarreal G, Shapiro MD, Brady SD, Southwick AM, Abser  
563 DM, Grimwood, J, Schmutz J, Myers RM, Petrov D, Jonsson B, Schluter D, Bell, MA,  
564 Kingsley DM (2010) Adaptive evolution of pelvic reduction in sticklebacks by recurrent  
565 deletion of a *Pitx1* enhancer. *Science*, **15**, 302–305.
- 566 Dice LR (1940) Ecologic and genetic variability within species of *Peromyscus*. *American*  
567 *Naturalist*, **74**, 212–221.
- 568 Dice LR (1941) Variation of the Deer-mouse (*Peromyscus maniculatus*) on the Sand hills of  
569 Nebraska and adjacent areas. *Contributions from the Laboratory of Vertebrate Biology*, **15**,  
570 1–19.
- 571 Domingues VS, Poh Y-P, Peterson BK *et al.* (2012) Evidence of adaptation from ancestral  
572 variation in young populations of beach mice. *Evolution*, **66**, 3209–3223.
- 573 Golley FB, Morgan EL, Carmon JL (1966) Progression of molt in *Peromyscus polionotus*.  
574 *Journal of Mammalogy*, **47**, 145–148.
- 575 Guan Y, Stephens M (2011) Bayesian variable selection regression for genome-wide association  
576 studies and other large-scale problems. *The Annals of Applied Statistics*, **5**, 1780–1815.
- 577 Haldane J (1948) The theory of a cline. *Journal of Genetics*, **48**, 277–284.
- 578 Hoekstra HE (2006) Genetics, development and evolution of adaptive pigmentation in

- 579 vertebrates. *Heredity*, **97**, 222–234.
- 580 Hoekstra HE, Coyne JA (2007) The locus of evolution: Evo devo and the genetics of adaptation.  
581 *Evolution*, **61**, 995–1016.
- 582 Hoekstra HE, Hirschmann RJ, Bunday RA, Insel PA, Crossland JP (2006) A single amino acid  
583 mutation contributes to adaptive beach mouse color pattern. *Science*, **313**, 101–104.
- 584 Jackson I (1994) Molecular and developmental genetics of mouse coat color. *Annual Review of*  
585 *Genetics*, **28**, 189–217.
- 586 Kim E, Goren A, Ast G (2008) Alternative splicing: current perspectives. *BioEssays*, **30**, 38–47.
- 587 Kingsley EP, Manceau M, Wiley CD, Hoekstra HE (2009) Melanism in *Peromyscus* is caused by  
588 independent mutations in *Agouti*. *PLoS One*, **4**, e6435.
- 589 Kowalko JE, Rohner N, Linden TA *et al.* (2013) Convergence in feeding posture occurs through  
590 different genetic loci in independently evolved cave populations of *Astyanax mexicanus*.  
591 *PNAS*, **110**, 16933–16938.
- 592 Kozak M (1999) Initiation of translation in prokaryotes and eukaryotes. *Gene*, **234**, 187–208.
- 593 Kozak M (2002) Pushing the limits of the scanning mechanism for initiation of translation. *Gene*,  
594 **299**, 1–34.
- 595 Landry J-R, Mager DL, Wilhelm BT (2003) Complex controls: the role of alternative promoters  
596 in mammalian genomes. *Trends in Genetics*, **19**, 640–648.
- 597 Linnen CR, Kingsley EP, Jensen JD, Hoekstra HE (2009) On the origin and spread of an adaptive  
598 allele in deer mice. *Science*, **325**, 1095–1098.
- 599 Linnen CR, Poh Y-P, Peterson BK *et al.* (2013) Adaptive evolution of multiple traits through  
600 multiple mutations at a single gene. *Science*, **339**, 1312–1316.
- 601 Livak KJ, Schmittgen TD (2001) Analysis of relative gene expression data using real-time  
602 quantitative PCR and the 2<sup>-Delta Delta C(T)</sup> Method. *Methods*, **25**, 402–408.
- 603 Loope DB, Swinehart JB (2000) Thinking like a dune field: Geologic history in the Nebraska  
604 Sand Hills. *Great Plains Research*, **10**, 5–35.
- 605 Manceau M, Domingues VS, Linnen CR, Rosenblum EB, Hoekstra HE (2010) Convergence in  
606 pigmentation at multiple levels: mutations, genes and function. *Philosophical Transactions of*  
607 *the Royal Society*, **365**, 2439–2450.
- 608 Manceau M, Domingues VS, Mallarino R, Hoekstra HE (2011) The developmental role of

- 609 Agouti in color pattern evolution. *Science*, **331**, 1062–1065.
- 610 Medenbach J, Seiler M, Hentze MW (2011) Translational control via protein-regulated upstream  
611 open reading frames. *Cell*, **145**, 902–913.
- 612 Merkin J, Russell C, Chen P, Burge CB (2012) Evolutionary dynamics of gene and isoform  
613 regulation in mammalian tissues. *Science*, **338**, 1593–1599.
- 614 Mullen LM, Hoekstra HE (2008) Natural selection along an environmental gradient: a classic  
615 cline in mouse pigmentation. *Evolution*, **62**, 1555–1570.
- 616 Muller-Rover S, Paus R (2001) A comprehensive guide for the accurate classification of murine  
617 hair follicles in distinct hair cycle stages. *Journal of Investigative Dermatology* **117**, 3–15.
- 618 Nadeau NJ, Minvielle F, Ito S, Inoue-Murayama M, Gourichon D, Follett SA, Burke T, Mundy  
619 NI (2008) Characterization of Japanese quail yellow as a genomic deletion upstream of  
620 the avian homologue of the mammalian ASIP (agouti) gene. *Genetics* **178**, 777–786.
- 621 Nielsen R, Williamson S, Kim Y *et al.* (2005) Genomic scans for selective sweeps using SNP  
622 data. *Genome Research*, **15**, 1566–1575.
- 623 Paus R, Cotsarelis G (1999) The biology of hair follicles. *New England Journal of Medicine*,  
624 **341**, 491–497.
- 625 Poh YP, Domingues VS, Hoekstra HE, Jensen JD (2014) On the prospect of identifying adaptive  
626 loci in recently bottlenecked populations. *PLoS One*, **9**, e110579.
- 627 Protas ME, Hersey C, Kochanek D, Zhou Y, Wilkens H, Jeffery WR, Zon LI, Borowsky R,  
628 Tabin CJ (2006) Genetic analysis of cavefish reveals molecular convergence in the evolution  
629 of albinism. *Nature Genetics*, **38**, 107–111.
- 630 Purcell S, Neale B, Todd-Brown K, Thomas L (2007) PLINK: a tool set for whole-genome  
631 association and population-based linkage analyses. *The American Journal of Human*  
632 *Genetics*, **81**, 559–575.
- 633 Reed RW, Papa R, Martin A, Hines HM, Counterman BA, Pardo-Diaz C, Jiggins CD,  
634 Chamberlain NL, Kronforst MR, Chen R, Halder G, Nijhout HF, McMillan WO (2011)  
635 *Optix* drives the repeated convergent evolution of butterfly wing pattern mimicry. *Science*,  
636 **333**, 1137–1141.
- 637 Rieder S, Taourit S, Mariat D, Langlois B, Guérin G (2001) Mutations in the agouti (ASIP), the  
638 extension (MC1R), and the brown (TYRP1) loci and their association to coat color

- 639 phenotypes in horses (*Equus caballus*). *Mammalian Genome*, **12**, 450–455.
- 640 Rosenblum EB, Parent CE, Brandt EE (2014) The molecular basis of phenotypic convergence.  
641 *Annual Reviews of Systematics and Ecology*, **45**, 203-226.
- 642 Rosenstiel P, Huse K, Franke A *et al.* (2007) Functional characterization of two novel 5'  
643 untranslated exons reveals a complex regulation of NOD2 protein expression. *BMC*  
644 *Genomics*, **8**, 472–480.
- 645 Schmutz SM, Berryere TG (2007) Genes affecting coat colour and pattern in domestic dogs: a  
646 review. *Animal Genetics*, **38**, 539–549.
- 647 Seo K, Mohanty TR, Choi T, Hwang I (2007) Biology of epidermal and hair pigmentation in  
648 cattle: a mini-review. *Veterinary Dermatology*, **18**, 392–400.
- 649 Shabalina SA, Ogurtsov AY, Spiridonov NA, Koonin EV (2014) Evolution at protein ends:  
650 major contribution of alternative transcription initiation and termination to the transcriptome  
651 and proteome diversity in mammals. *Nucleic Acids Research*, **42**, 7132–7144.
- 652 Song KY, Hwang CK, Kim CS *et al.* (2007) Translational repression of mouse mu opioid  
653 receptor expression via leaky scanning. *Nucleic Acids Research*, **35**, 1501–1513.
- 654 Stapor FW Jr, Mathews TD (1991) Barrier-island progradation and Holocene sea-level history in  
655 southwest Florida. *Journal of Coastal Research*, **7**, 815–838.
- 656 Steiner CC, Weber JN, Hoekstra HE (2007) Adaptive variation in beach mice produced by two  
657 interacting pigmentation genes. *PLoS Biology*, **5**, e219.
- 658 Steiner CC, Rompler H, Boettger LM, Schoneberg T, Hoekstra HE (2009) The genetic basis of  
659 phenotypic convergence in beach mice: similar pigment patterns but different genes.  
660 *Molecular Biology and Evolution*, **26**, 35-45.
- 661 Stern DL, Orgogozo V (2008) The loci of evolution: how predictable is genetic evolution?  
662 *Evolution*, **62**, 2155–2177.
- 663 Thornton KR, Jensen JD, Becquet C, Andolfatto P (2007) Progress and prospects in mapping  
664 recent selection in the genome. *Heredity*, **98**, 340–348.
- 665 van Ditmarsch D, Boyle KE, Sakhtah H *et al.* (2013) Convergent evolution of hyperswarming  
666 leads to impaired biofilm formation in pathogenic bacteria. *Cell Reports*, **4**, 697–708.
- 667 Vignieri SN, Larson JG, Hoekstra HE (2010) The selective advantage of crypsis in mice.  
668 *Evolution*, **64**, 2153–2158.

- 669 Voisey J, Box NF, van Daal A (2001) A polymorphism study of the human Agouti gene and its  
670 association with MC1R. *Pigment Cell Research*, **14**, 264–267.
- 671 Vrieling H, Duhl DM, Millar SE, Miller KA, Barsh GS (1994) Differences in dorsal and ventral  
672 pigmentation result from regional expression of the mouse agouti gene. *PNAS*, **91**, 5667–  
673 5671.
- 674 Weng J-K, Akiyama T, Bonawitz ND *et al.* (2010) Convergent evolution of syringyl lignin  
675 biosynthesis via distinct pathways in the lycophyte *Selaginella* and flowering plants. *The*  
676 *Plant Cell*, **22**,1033–1045.
- 677 Woods R, Schneider D, Winkworth CL, Riley MA, Lenski RE (2006) Tests of parallel molecular  
678 evolution in a long-term experiment with *Escherichia coli*. *PNAS*, **103**, 9107–9112.
- 679 Zhen Y, Aardema ML, Medina EM, Schumer M, Andolfatto P (2012) Parallel molecular  
680 evolution in an herbivore community. *Science*, **337**, 1634–1637.

681

#### 682 **Data accessibility**

683 Museum voucher numbers from specimens used for phenotypic measurements will be provided  
684 prior to publication. A file with gene expression values (CT values) for all individuals and  
685 genes/isoforms will be provided.

686

#### 687 **Acknowledgements**

688 We thank Judy Chupasko and Mark Omura for help with specimen preparation, and Nikki  
689 Hughes for providing logistical support. RM and the molecular work was supported by a Swiss  
690 National Science Foundation grant to HEH. TAL was supported by a Herchel Smith-Harvard  
691 Undergraduate Research Fellowship. CRL was supported by a Ruth Kirschstein National  
692 Research Service Award from NIH. HEH is an Investigator of the Howard Hughes Medical  
693 Institute.

694

695 **Author contributions**

696 RM, CRL, and HEH conceived the project and designed the experiments. RM, TAL, and CRL  
697 performed experiments and analyzed data. All authors wrote the paper.

698 **Figure legends**

699 **Figure 1. Environmental and phenotypic differences between ancestral and derived**  
700 **habitats and mice in Nebraska and Florida.** (A) Photographs of wild-type *Peromyscus*  
701 *maniculatus bairdii* (WT), wideband *P. m. nebrascensis* (WB), *P. polionotus subgriseus*  
702 mainland, and *P. p. leucocephalus* beach mice (top), typical habitats (bottom), and soil (bottom  
703 inset). (B) Dorsal brightness (total dorsal reflectance) measured in mice from ancestral (black  
704 circles) and derived (white circles) habitats. (C) Reflectance of soil samples from ancestral (black  
705 circles) and derived (white circles) habitats. Soil samples are from Cherry County, Sparks,  
706 Nebraska vs. Cherry County, Schlagel, Nebraska; Jackson County, Graceville, Florida vs.  
707 Okaloosa County, Santa Rosa Island (SRI) Florida. \*  $P < 0.05$ , \*\* $P < 0.01$ , \*\*\* $P < 0.001$ , two-  
708 tailed  $t$ -tests;  $n = 4$  (mice) and  $n = 5$  (soil).

709  
710  
711 **Figure 2. Characterization of *Agouti* isoform expression in *P. maniculatus*.** (A) *Agouti*  
712 isoforms expressed in the ventrum and dorsum of *M. musculus* pups (strain A<sup>W</sup>) and *P.*  
713 *maniculatus* (pups and adults). (B) Map of the *Agouti* locus in *M. musculus* (above) and *P.*  
714 *maniculatus* (below). Colors in (A) and (B) represent ventral specific non-coding exons (blue),  
715 hair cycle-specific non-coding exons (red), and the novel non-coding exons (green) reported here.  
716 Coding exons (black) are common to all isoforms.

717  
718  
719 **Figure 3. Differential expression of *Agouti* isoforms between wideband and wild-type mice.**  
720 (A) qPCR in adults (> 60 days) shows that the overall expression of *Agouti* mRNA in wideband  
721 mice (light circles) is 18-fold higher than wild-type mice (dark circles). (B) Isoform-specific  
722 mRNA levels of isoform 1C are 17-fold higher in wideband than wild-type mice, but no  
723 significant differences in 1D or 1E expression. (C) qPCR measurements of overall *Agouti* mRNA  
724 levels at different time points after hair removal show that wideband and wild-type mice differ in  
725 the expression of total *Agouti* at days 3, 7, and 9 after depilation. (D) Isoform specific  
726 measurements show that isoform 1C differs between the two strains at days 3, 7, and 9, whereas  
727 isoforms 1D and 1E do not differ between the two strains, with the exception of 1E, which differs  
728 at day 5. \*  $P < 0.05$ , \*\* $P < 0.01$ , \*\*\* $P < 0.001$ , two-tailed  $t$ -tests;  $n = 4$  (for each strain in (A) and  
729 (B)) and  $n = 3$  (for each strain and time point in (C) and (D)); red bars indicate the mean.

730  
731  
732 **Figure 4. *Agouti* isoforms differ in luciferase production.** (A) Relative luciferase levels  
733 produced by transcripts carrying the three different 5' UTRs expressed in *P. maniculatus*. \*  $P <$   
734  $0.05$ , \*\* $P < 0.01$ , \*\*\* $P < 0.001$ , two tailed  $t$ -tests;  $n = 6$  per construct. (B) mRNA levels of  
735 luciferase did not differ between the constructs demonstrating that differences seen in (A) occur  
736 at the posttranscriptional level; ANOVA,  $n = 3$ . Only results from wild-type sequences are  
737 shown. (C) (Above) The sequence of exon 1D (black font) in wild-type *P. maniculatus*.  
738 Upstream start codons are boxed in red, the beginning of exon 2 is in green font, and the  
739 functional ATG is boxed in blue. (Below) Quantification of relative luciferase levels from  
740 transcripts carrying the *P. maniculatus* wild-type exon 1D and those carrying a version of exon  
741 1D where each upstream ATG site has been mutated to ACG, relative to a control lacking a 5'

742 UTR. \*  $P < 0.05$ , \*\* $P < 0.01$ , \*\*\* $P < 0.001$ , two tailed  $t$ -tests;  $n = 5$  per construct; red bars  
743 indicate the mean. In all cases, luciferase levels are normalized relative to background levels.

744  
745  
746 **Figure 5. Genetic variation near exon 1C is associated with dorsal color, *Agouti* expression,**  
747 **and signatures of selection in a natural population of *P. maniculatus*.** (A, B) Strength of  
748 statistical association ( $-\log$  p-value) between dorsal brightness (A) and *Agouti* expression (B) for  
749 466 SNPs (circles) tested in  $n = 91$  (A) or 88 (B) mice. SNPs significant after a 10% FDR  
750 correction are indicated in red. The gray bar highlights the location of exon 1C, and the dashed  
751 lines indicate a 20-kb region centered on this exon. Color (A) and expression (B) both have  
752 multi-SNP peaks of association centered on exon 1C. (C) Strength of evidence favoring a  
753 selection model over a neutral model (likelihood ratios) as a function of location in *Agouti*.  
754 Likelihood surfaces are shown for light (red) and dark (black) haplotypes, as determined by the  
755 strongest associated SNP in (A). Dashed lines indicate significance thresholds, determined via  
756 neutral simulations, for light (red) and dark (black) haplotypes. Data for (A) and (C) are from  
757 Linnen *et al.* 2013.

758  
759  
760 **Figure 6. Differential *Agouti* and *Agouti* isoform expression in dark and light *P. polionotus*.**  
761 (A) Mice with the light beach allele (*Agouti LL*; light circles) have two-fold higher expression of  
762 *Agouti* than mainland mice (*Agouti DD* mice; dark circles), as determined by qPCR. (B)  
763 Expression of isoform 1C is four-fold higher in *Agouti LL* mice (light circles) compared to  
764 mainland mice (dark circles), whereas there were no significant differences in 1D or 1E  
765 expression. \*  $P < 0.05$ , \*\* $P < 0.01$ , \*\*\* $P < 0.001$ , two-tailed  $t$ -tests;  $n = 4$  mice for each strain;  
766 red bars indicate the mean.



**(A)**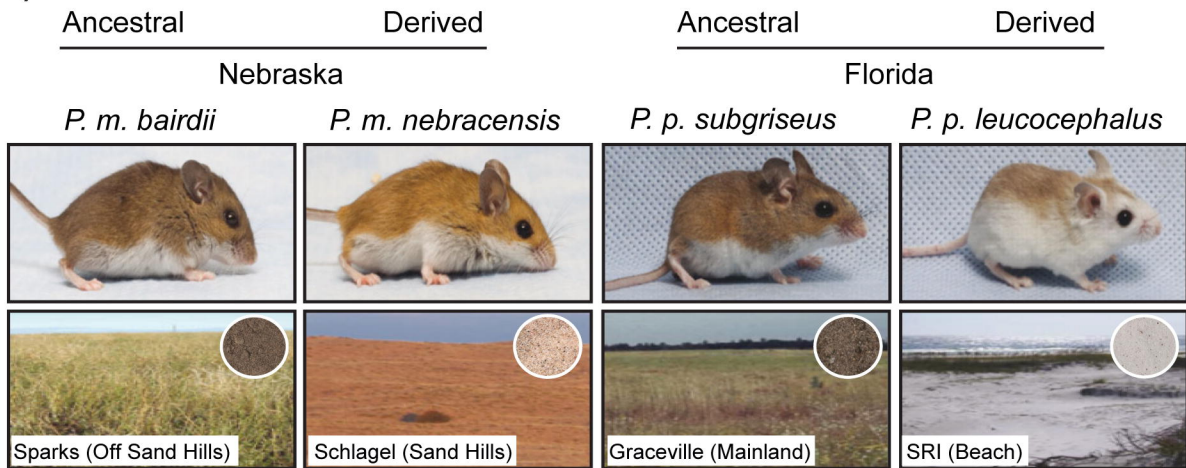**(B)**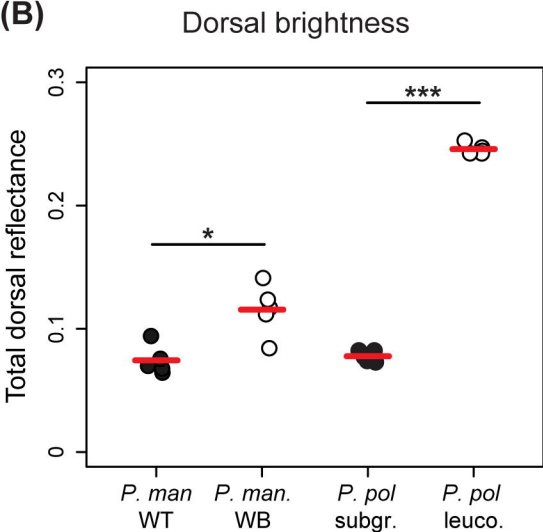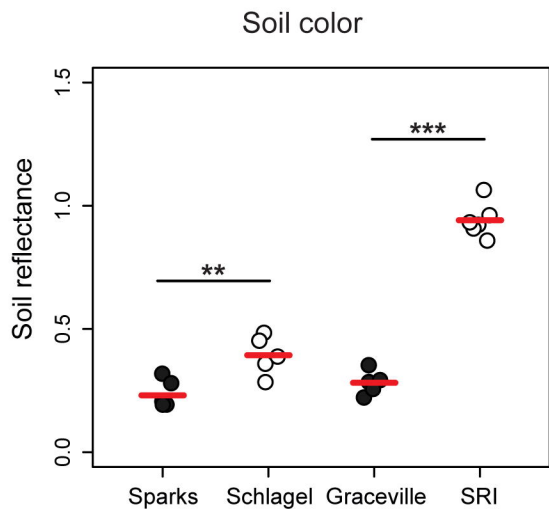

**(A)***M. musculus* (*A<sup>w</sup>*)    *P. maniculatus*

|         |                                |                      |
|---------|--------------------------------|----------------------|
| Dorsum  | 1B, 1C, 1B1C                   | 1C, 1D, 1E           |
| Ventrum | 1A, 1A', 1A1A'<br>1B, 1C, 1B1C | 1A, 1A', 1A1A'<br>1C |

**(B)**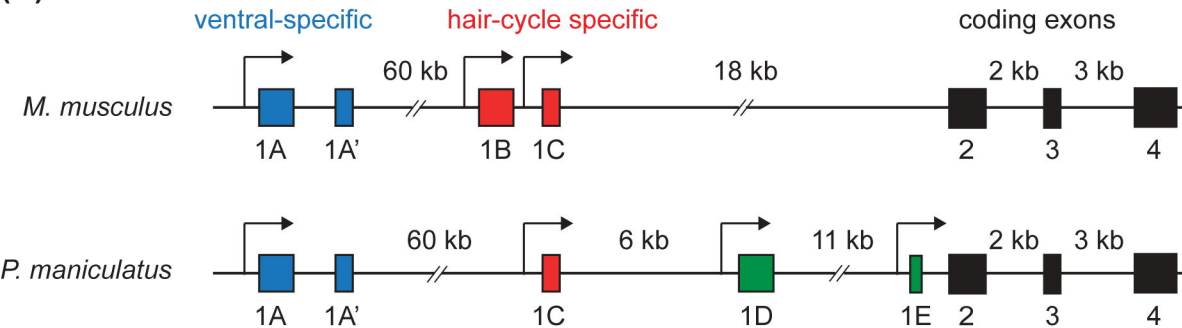

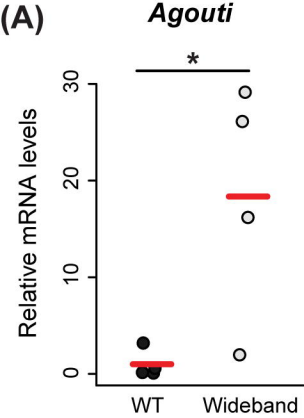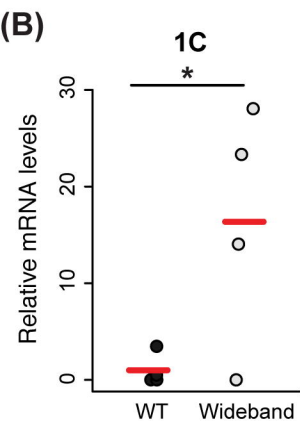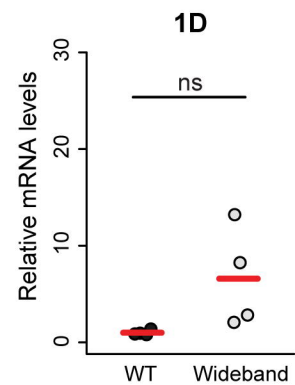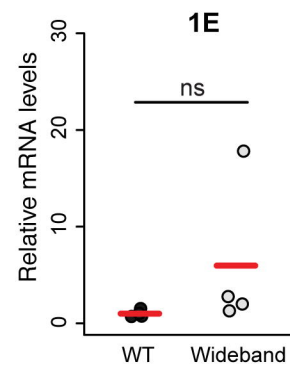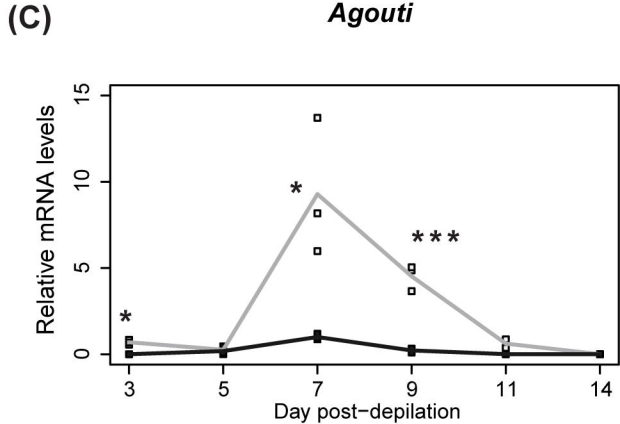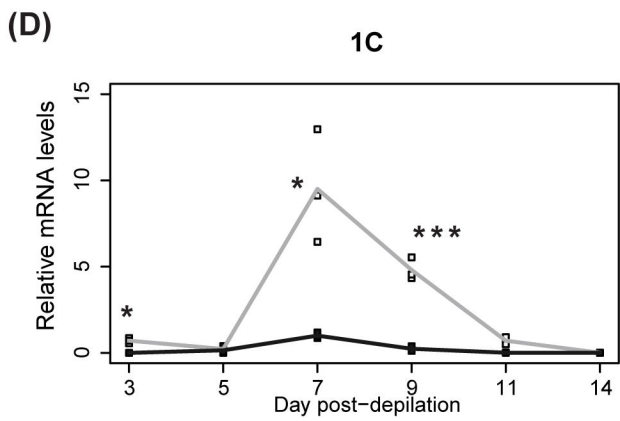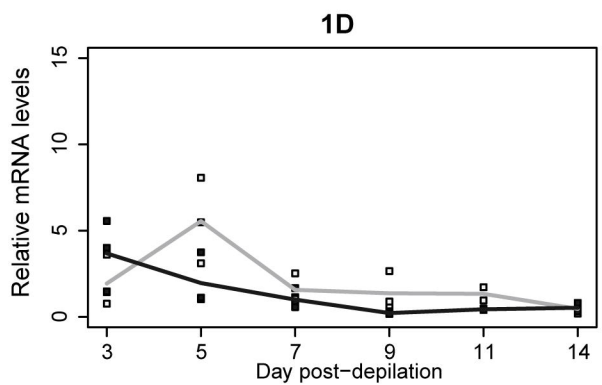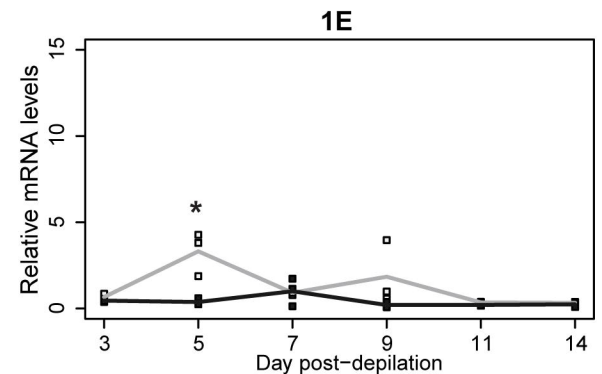

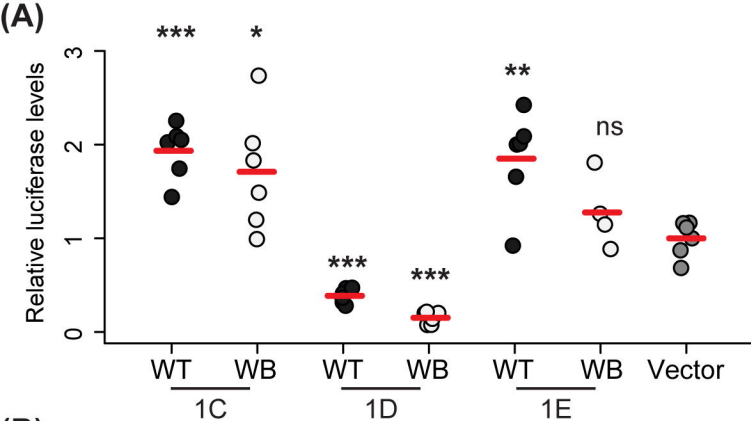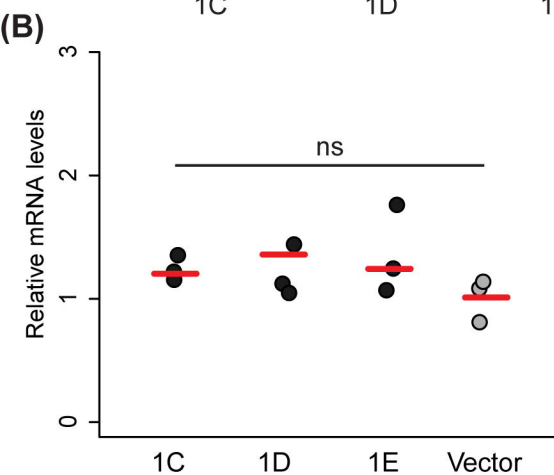

**(C) 1D WT**

ATA **ATG** GCCTCGCGCCTCGCCTCCAGGCGCTAGAACTGC **ATG** CA  
 GGTGCGCAGCATCACTCCTCAGGCCGGTCTTCTGCTTCCCGTCC  
 ACTCCTGGGAAAGTGCAGAGCTAGGTCTGGG **ATG** ACTTCTTCCAC  
 GGCCGTA CT TCTGC **AGCTTTTCAGG** **ATG**

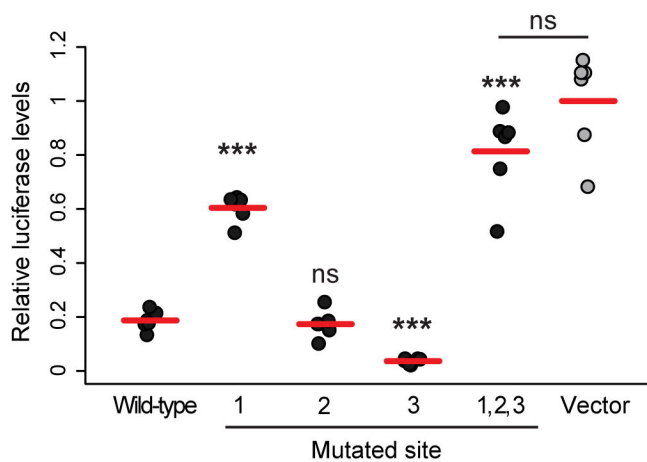

**(A)**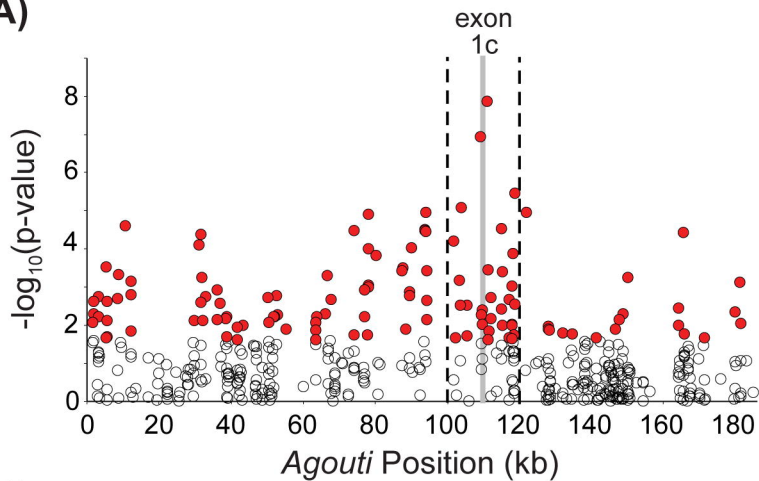**(B)**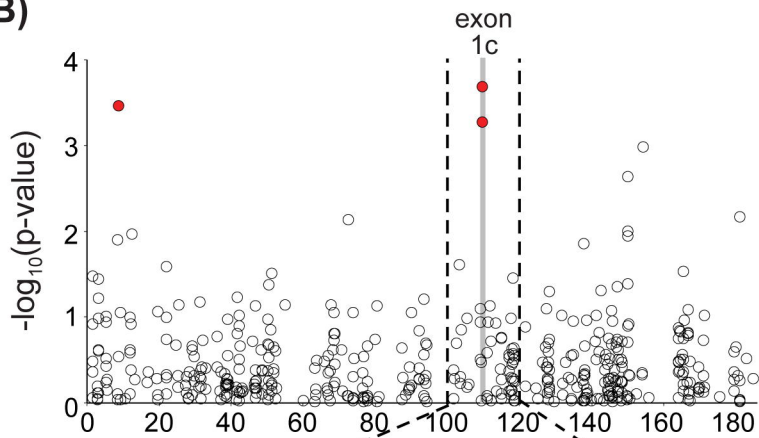**(C)**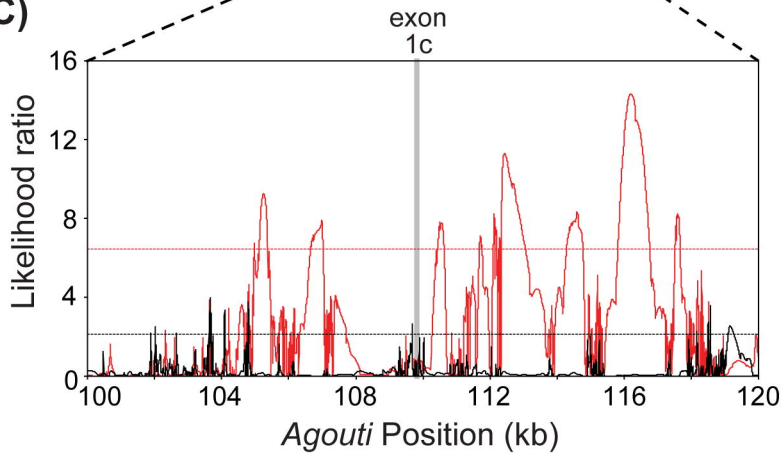

**(A)**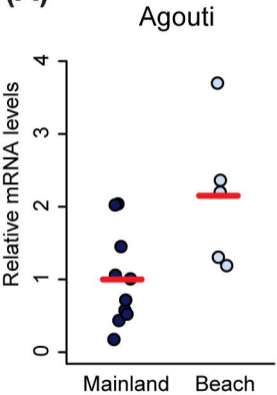**(B)**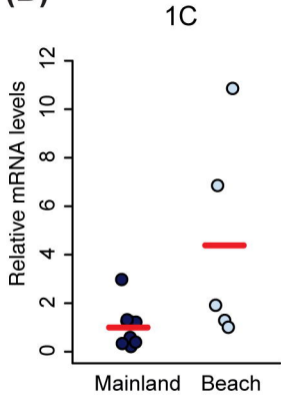

1D

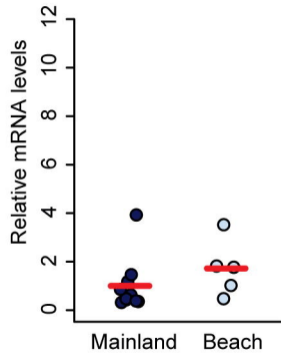

1E

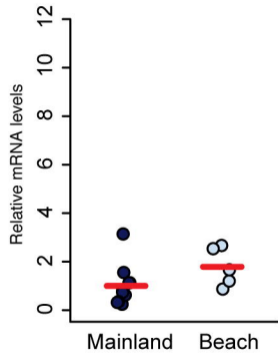

Source: http://biorxiv.org/content/10.1101/041087v1.full.pdf
